# Supplementary material
Source: publisher figshare collection journal article supplement (https://acs.figshare.com/ndownloader/files/27413682)
Supplement: Supplementary file 1 [file 27413682]

## Supporting Information

### Theory-Guided Synthesis of Highly Luminescent Colloidal Cesium Tin Halide Perovskite Nanocrystals

Qi Liu,<sup>†,¶</sup> Jun Yin,<sup>‡,¶</sup> Bin-Bin Zhang,<sup>§,//,¶</sup> Jia-Kai Chen,<sup>§,//</sup> Yang Zhou,<sup>‡</sup> Lu-Min Zhang,<sup>†</sup> Lu-Ming Wang,<sup>†</sup> Qing Zhao,<sup>§</sup> Jingshan Hou,<sup>⊥</sup> Jie Shu,<sup>#</sup> Bo Song,<sup>†</sup> Naoto Shirahata,<sup>§,//,△</sup> Osman M. Bakr,<sup>‡</sup> Omar F. Mohammed,<sup>\*,‡</sup> and Hong-Tao Sun<sup>\*,§</sup>

<sup>†</sup>College of Chemistry, Chemical Engineering and Materials Science, Soochow University, Suzhou 215123, China

<sup>‡</sup>Advanced Membranes and Porous Materials Center (AMPMC) & KAUST Catalysis Center (KCC), Division of Physical Sciences and Engineering, King Abdullah University of Science and Technology (KAUST), Thuwal 23955-6900, Kingdom of Saudi Arabia

<sup>§</sup>International Center for Materials Nanoarchitectonics (MANA), National Institute for Materials Science (NIMS), 1-2-1 Sengen, Tsukuba 305-0047, Japan

<sup>//</sup> Graduate School of Chemical Sciences and Engineering, Hokkaido University, Sapporo 060-0814, Japan

<sup>⊥</sup> School of Materials Science and Engineering, Shanghai Institute of Technology, Shanghai 201418, China

<sup>#</sup>Analysis and Testing Center, Soochow University, Jiangsu 215123, China

<sup>△</sup>Department of Physics, Chuo University, Tokyo 112-8551, Japan

<sup>¶</sup>Q. Liu, J. Yin, and B.-B. Zhang contributed equally to this work.

**Detailed method for the calculation of the average lifetime, radiative and non-radiative recombination rates:** We used the following method to roughly evaluate the radiative and nonradiative recombination rates. The photoluminescence quantum yield (PLQY) is defined as the ratio of emitted photons per absorbed photons. The radiative recombination and the non-radiative recombination both depopulated the excited state. Hence, the PLQY is also defined as the ratio of the radiative recombination rate to the total recombination rate, given by equation (1),

$$PLQY = \frac{\Gamma_{rad}}{\Gamma_{rad} + \Gamma_{non-rad}} \quad (1)$$

where  $\Gamma_{rad}$  and  $\Gamma_{non-rad}$  are the radiative and non-radiative recombination rates, respectively.

The lifetime of the excited state refers to the average residence time of the photon in the excited state before returning to the ground state. The average lifetime is the reciprocal of the total recombination rate, which is calculated using the following equation,

$$\tau_{ave} = \frac{1}{\Gamma_{rad} + \Gamma_{non-rad}} \quad (2)$$

where  $\tau_{ave}$  is the average lifetime. The decays of CsSnI<sub>3</sub> NCs were fitted by a single-, bi- or tri-exponential function,

$$I(t) = A_1 e^{-t/\tau_1} + A_2 e^{-t/\tau_2} + A_3 e^{-t/\tau_3} + \dots A_0 \quad (3)$$

where  $A_i$  ( $i=1, 2$ , and  $3$ ) and  $\tau_i$  ( $i=1, 2$ , and  $3$ ) are the amplitudes and the corresponding fitted lifetimes, respectively,  $A_0$  is a constant. The average lifetime ( $\tau_{ave}$ ) was calculated as follows,

$$\tau_{ave} = (A_1 \tau_1^2 + A_2 \tau_2^2 + A_3 \tau_3^2 + \dots) / (A_1 \tau_1 + A_2 \tau_2 + A_3 \tau_3 + \dots) \quad (4)$$

Based on the PLQY and  $\tau_{ave}$ , we calculated the radiative and non-radiative recombination rates as follows,

$$\Gamma_{rad} = \frac{PLQY}{\tau_{ave}} \quad (5)$$

$$\Gamma_{non-rad} = \frac{1}{\tau_{ave}} - \Gamma_{rad} = \frac{1 - PLQY}{\tau_{ave}} \quad (6)$$

**Defect calculations at the HSE06+SOC level.** The HSE06 including SOC was also used to calculate defect formation energies and defect charge-transition levels. The contribution of the Hartree-Fock exchange potential was set at 0.25, and the plane-wave basis set cutoff of the wavefunctions was set at 400 eV. In equilibrium growth conditions, the chemical potential  $\mu_i$  should satisfy the following equations:  $\mu_{Cs} + \mu_{Sn} + 3\mu_I = \Delta H (CsSnI_3) = -7.35$  eV;  $\mu_{Sn} + 2\mu_I < \Delta H (SnI_2) = -1.76$  eV;  $\mu_{Cs} + \mu_I < \Delta H (CsI) = -5.31$  eV.

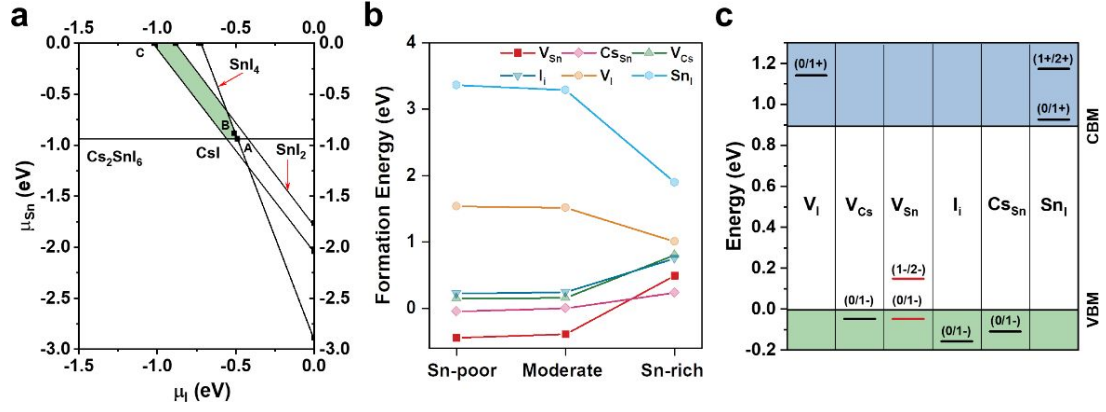

**Figure S1.** (a) Stability regions of different compounds vs. I and Sn chemical potentials of CsSnI<sub>3</sub>. The shaded region indicates the equilibrium chemical potential region. The representative points (A: Sn-poor/I-rich, B: moderate, C: Sn-rich/I-poor conditions) are chosen for the defect formation energy calculations. (b) Calculated defect formation energies for 2×2×2 orthorhombic CsSnI<sub>3</sub> supercell at Sn-poor/I-rich, moderate, and Sn-rich/I-poor conditions, corresponding to A, B, C point in (a), respectively. (c) Defect charge-transition levels of CsSnI<sub>3</sub>. These calculations were performed at the HSE06+SOC level of theory.

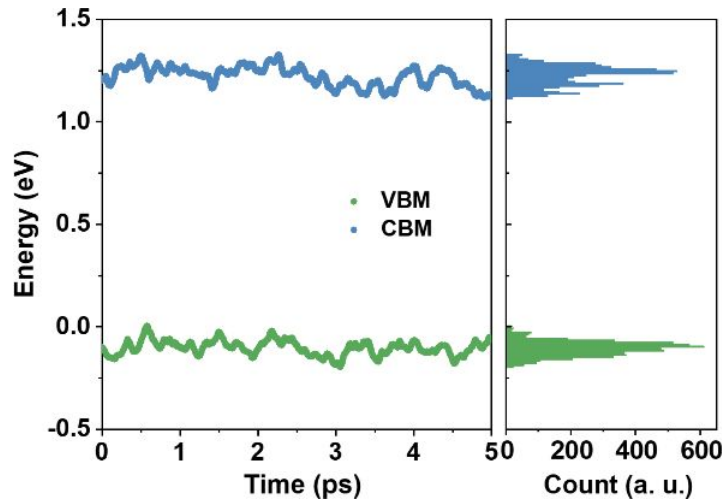

**Figure S2.** Time evolution of the VBM and CBM for 2×2×2 CsSnI<sub>3</sub> supercell with Cs<sub>Sn</sub> at 300 K. The fluctuation widths of VBM and CBM for pristine CsSnI<sub>3</sub> are 0.200 and 0.209 eV, respectively.

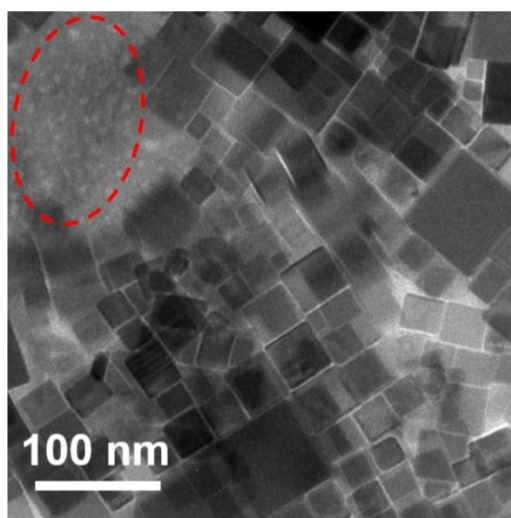

**Figure S3.** Low-magnification TEM image of 0.25:4.8. The area in the plotted ellipse indicates the presence of some byproducts.

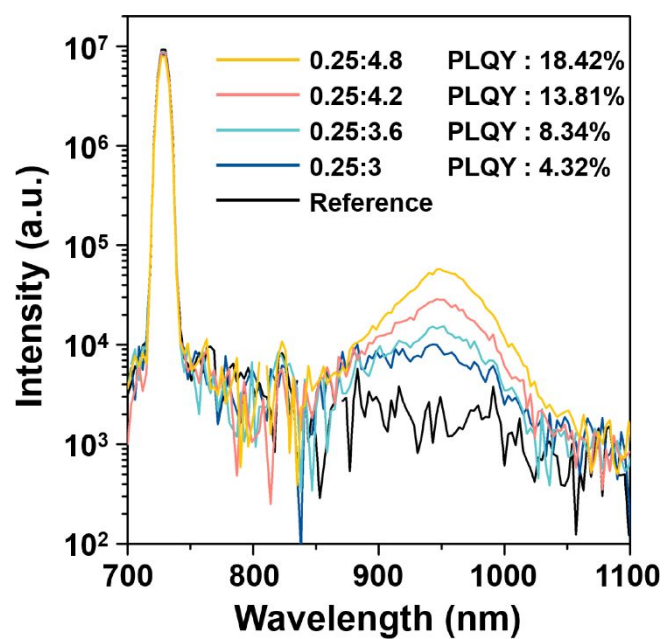

**Figure S4.** PLQY measurements of  $\text{CsSnI}_3$  NCs prepared with different Cs:Sn precursor ratios.

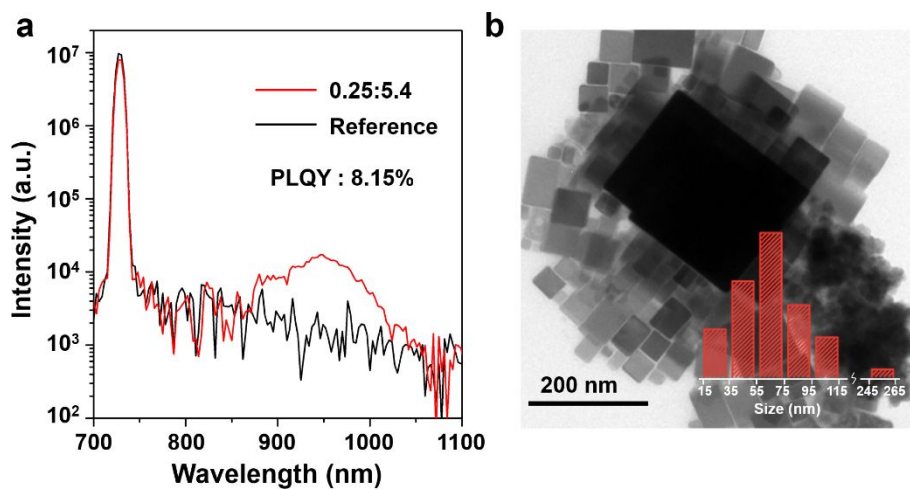

**Figure S5.** (a) PLQY measurement and (b) TEM image of 0.25:5.4. Inset in (b) shows the histogram of edge lengths of corresponding NCs.

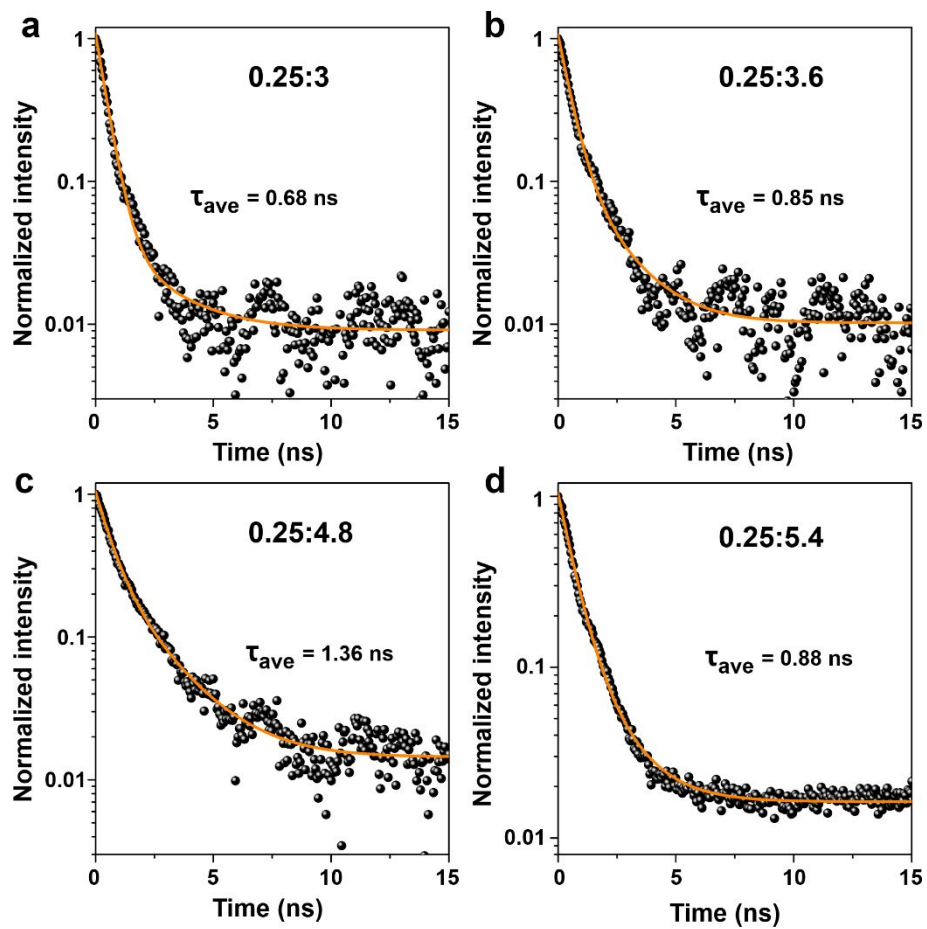

**Figure S6.** PL decays (black dots) and fitted curves (red lines) of (a) 0.25:3, (b) 0.25:3.6, (c) 0.25:4.8, and (d) 0.25:5.4 NCs.

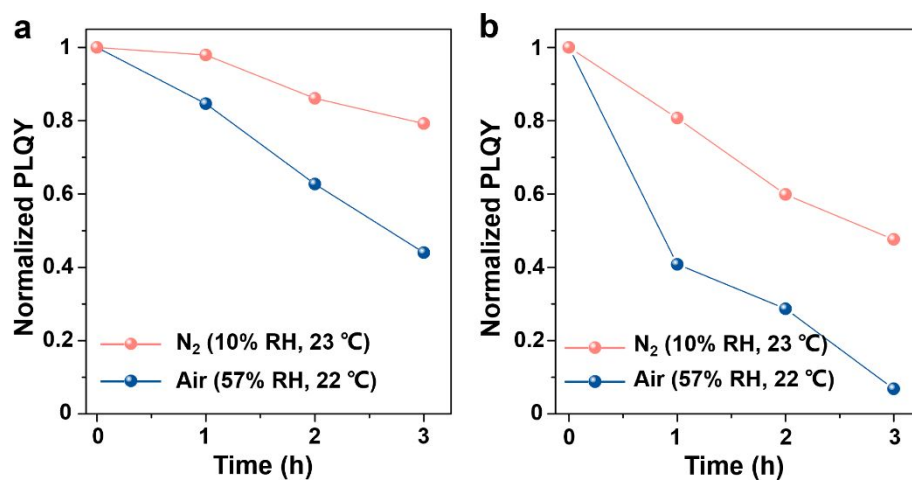

**Figure S7.** a) Temporal evolution of PLQYs of 0.25:4.2 NCs dispersed in hexane in air (57% relative humidity, RH) and under N<sub>2</sub> atmosphere (10% RH). For OAm and OA, their combination with NCs is highly dynamic and labile. This degradation can be linked to the low density of ligands on the surface. b) Temporal evolution of PLQYs of the CsSnI<sub>3</sub> NCs synthesized according to the reported strategy.<sup>1</sup>

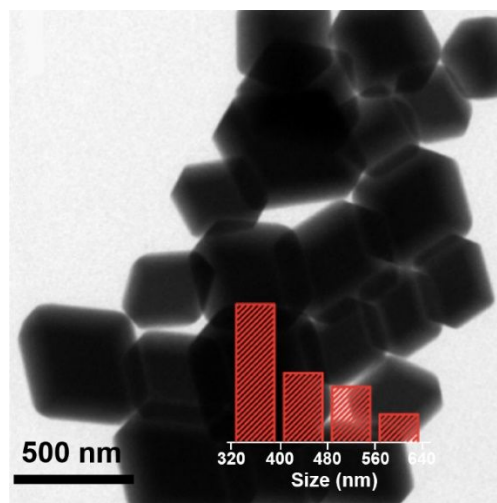

**Figure S8.** Low-magnification TEM image of 0.25:4.2:2 NCs. Inset shows the histogram of edge lengths of corresponding NCs.



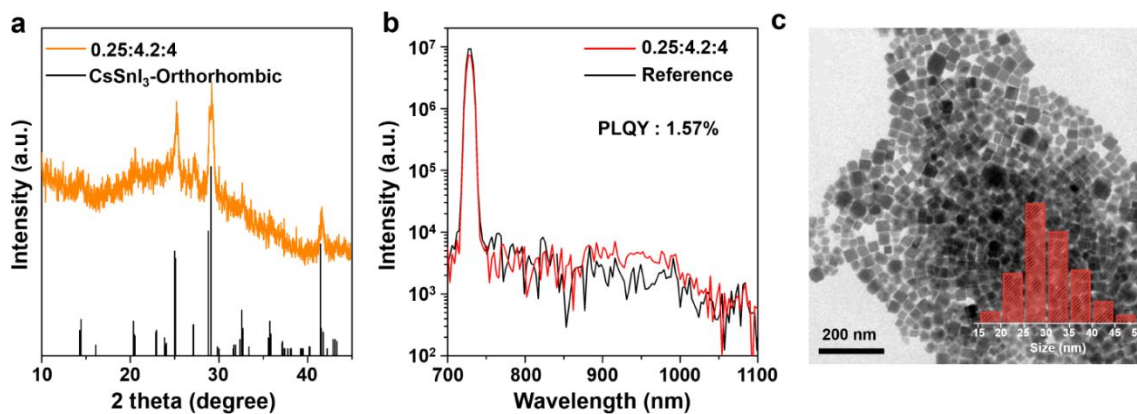

**Figure S9.** (a) XRD pattern of 0.25:4.2:4 NCs. (b) PLQY measurement and (c) TEM image of 0.25:4.2:4 NCs. Inset in (c) shows the histogram of edge lengths of corresponding NCs.

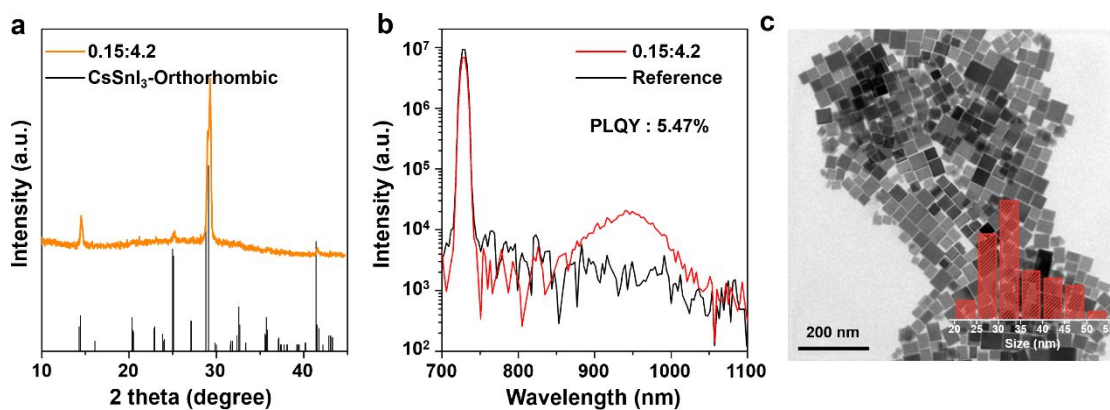

**Figure S10.** (a) XRD pattern of 0.15:4.2 NCs. (b) PLQY measurement and (c) TEM image of 0.15:4.2 NCs. Inset in (c) shows the histogram of edge lengths of corresponding NCs.

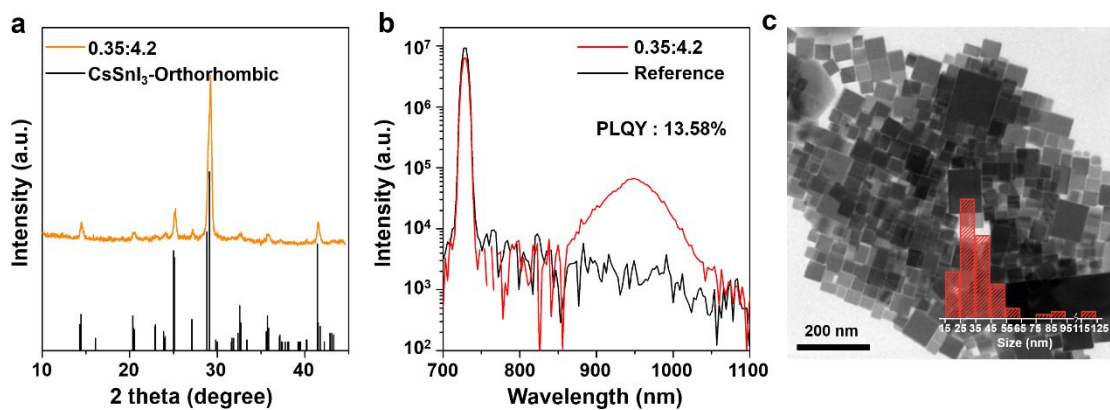

**Figure S11.** (a) XRD pattern of 0.35:4.2 NCs. (b) PLQY measurement and (c) TEM image of 0.35:4.2 NCs. Inset in (c) shows the histogram of edge lengths of corresponding NCs.

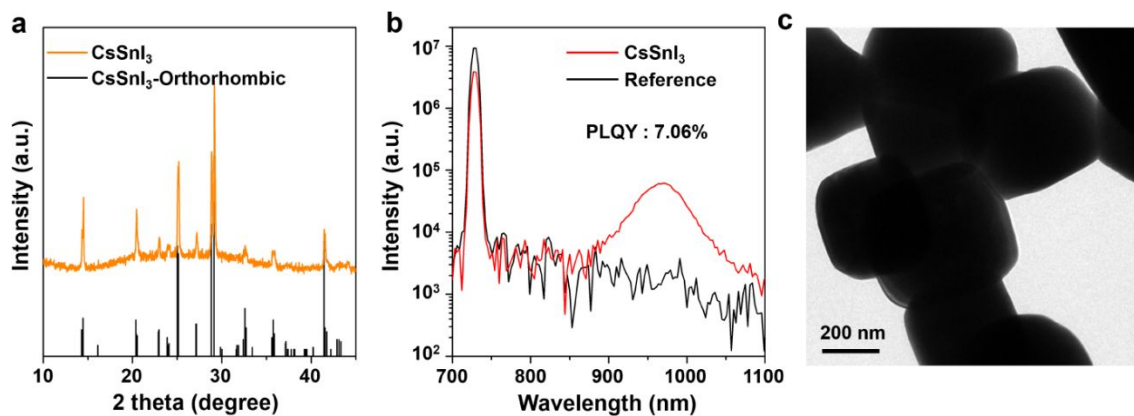

**Figure S12.** (a) XRD pattern, (b) PLQY measurement, and (c) TEM image of the product.  $\text{CsSnI}_3$  was synthesized by replacing TMSI with equimolar amount of benzoyl iodine, while keeping the other synthetic parameters same with those of 0.25:4.2.

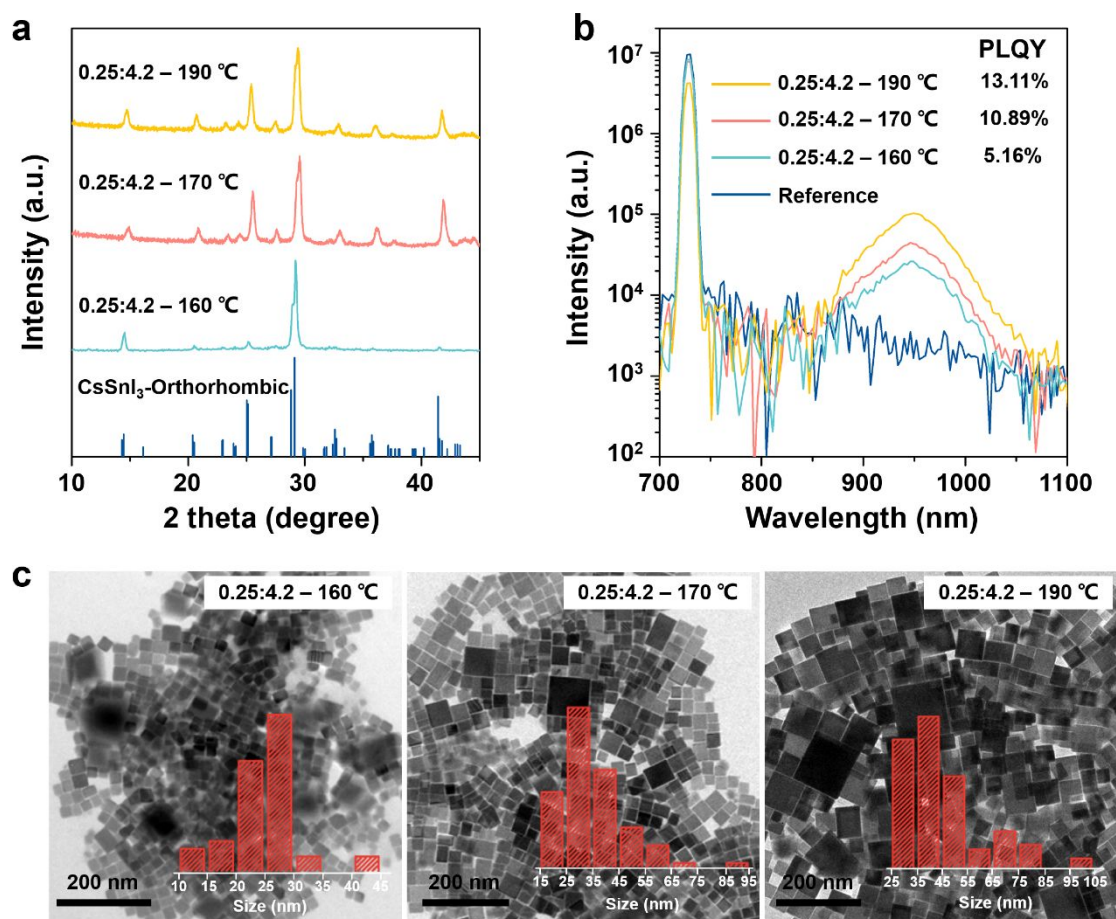

**Figure S13.** (a) XRD patterns, (b) PLQY measurement, and (c) TEM images of CsSnI<sub>3</sub> NCs synthesized at different temperatures. We note that the PLQYs and size of CsSnI<sub>3</sub> NCs increase with increasing reaction temperatures.

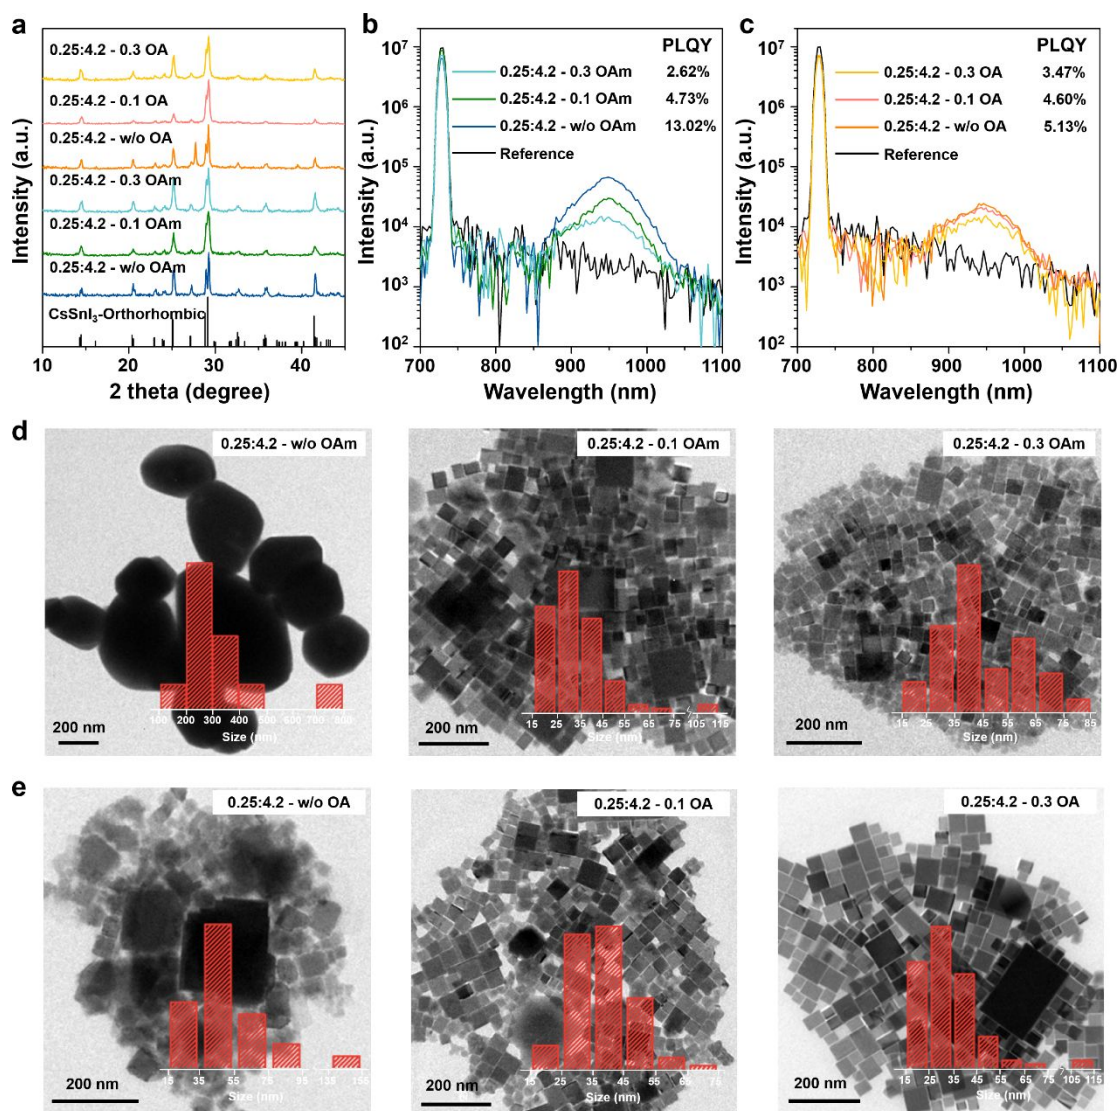

**Figure S14.** (a) XRD patterns, (b, c) PLQY measurement, and (d, e) TEM images of CsSnI<sub>3</sub> NCs synthesized with different amounts of OA and OAm. The detailed synthetic parameters are shown in Table S1. The final size of 0.25:4.2-w/o OAm exceeds 100 nm (Figure S14d, on the left), indicating that OAm plays a very important role in controlling the growth rate of CsSnI<sub>3</sub>. The larger the size, the smaller the specific surface area. That is, less defects on the surface of NCs could contribute to the high PLQY.



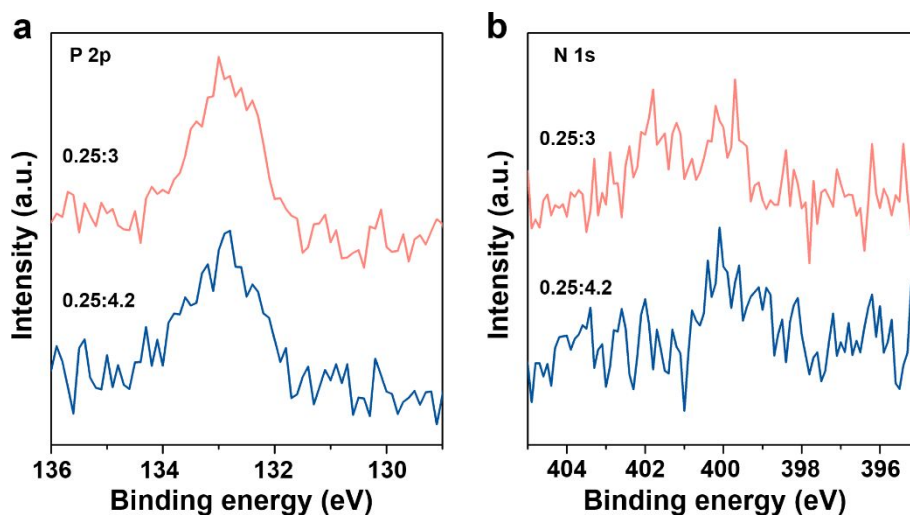

**Figure S15.** High-resolution XPS spectra of (a) P 2p and (b) N 1s for 0.25:3 and 0.25:4.2 NCs. The binding energies were calibrated using the free carbon C 1s peak at 284.8 eV.

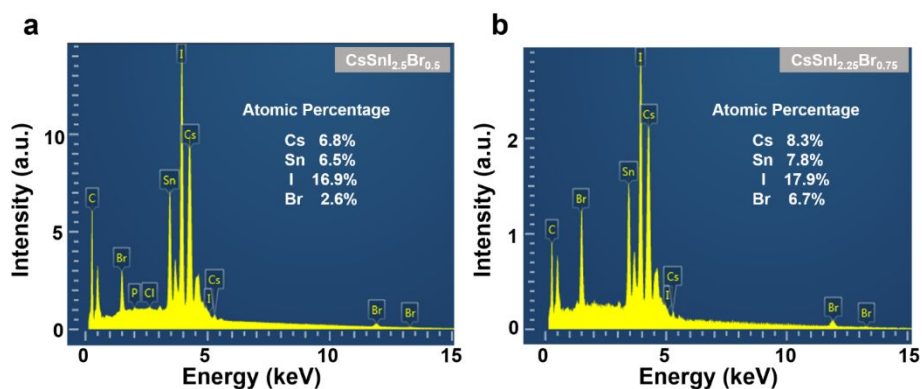

**Figure S16.** EDS of (a) CsSnI<sub>2.5</sub>Br<sub>0.5</sub> and (b) CsSnI<sub>2.25</sub>Br<sub>0.75</sub> NCs. Note that we used the nominal compositions for denoting the products.

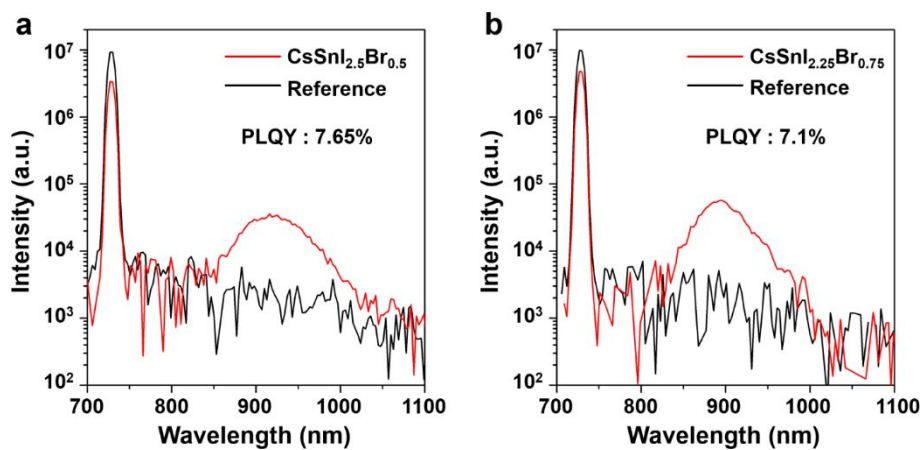

**Figure S17.** PLQY measurement of (a)  $\text{CsSnI}_{2.5}\text{Br}_{0.5}$  and (b)  $\text{CsSnI}_{2.25}\text{Br}_{0.75}$  NCs.

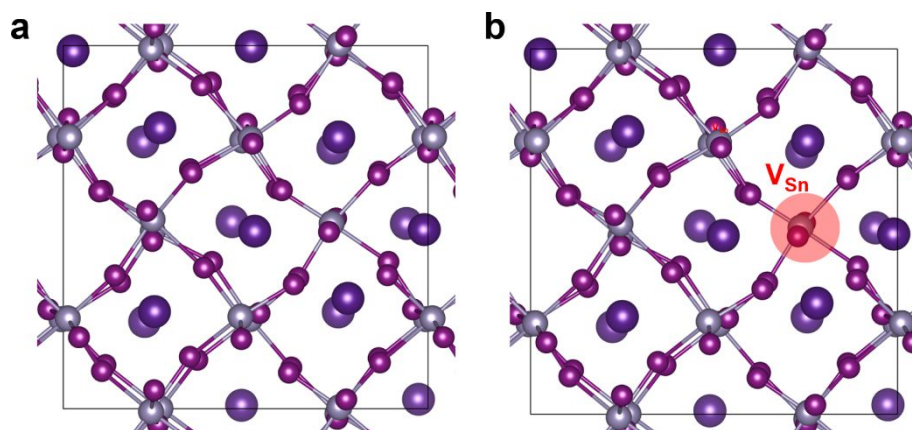

**Figure S18.** (a) 2×2×2 pristine  $\text{CsSnI}_3$  and (b)  $\text{CsSnI}_3$  supercell with  $V_{\text{Sn}}$  used for the MD simulations.

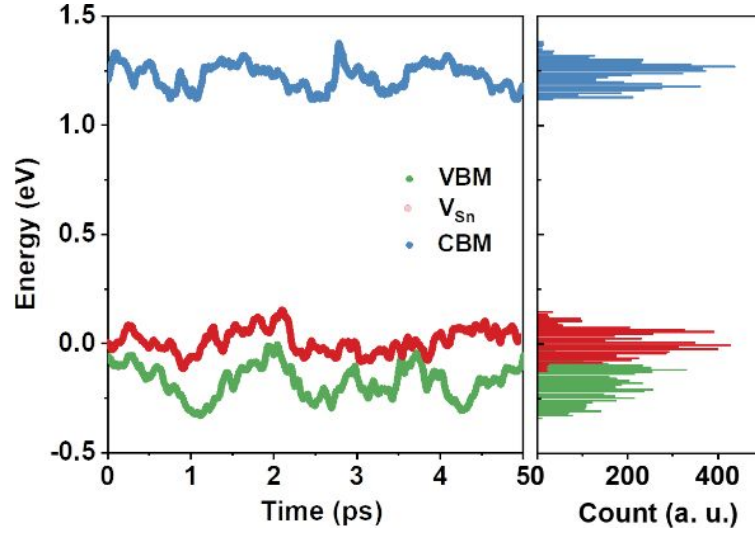

**Figure S19.** Time evolution of the VBM and CBM for  $2 \times 2 \times 1$  CsSnI<sub>3</sub> supercell with  $V_{\text{Sn}}$  at 300 K. The fluctuation widths of VBM and CBM are 0.327 and 0.257 eV, respectively.

**Table S1.** Synthetic parameters used for the synthesis of CsSnI<sub>3</sub>, CsSnI<sub>2.5</sub>Br<sub>0.5</sub>, and CsSnI<sub>2.25</sub>Br<sub>0.75</sub> NCs. We note that 0.25:4.2:2 and 0.25:4.2:4 NCs are denoted by the molar ratio of Cs, Sn and I precursors, while for the 0.25:4.2-*x* NCs, *x* represents either the reaction temperature or the parameter related to ligands. The exact amount of chemicals with purity less than 99.9% was calculated after considering their respective purity. For oleylamine, the purity of 85% was used for the calculation.

| Sample                                   | Cs <sub>2</sub> CO <sub>3</sub><br>(g) | Sn(Oct) <sub>2</sub><br>(mL) | TMSI<br>(mL) | TMSBr<br>(mL) | OA<br>(mL) | OAm<br>(mL) | TOP<br>(mL) | Temperature<br>(°C) |
|------------------------------------------|----------------------------------------|------------------------------|--------------|---------------|------------|-------------|-------------|---------------------|
| 0.25:3                                   | 0.0326                                 | 0.80                         | 0.344        | /             | 0.2        | 0.2         | 1.63        | 180                 |
| 0.25:3.6                                 | 0.0326                                 | 0.96                         | 0.344        | /             | 0.2        | 0.2         | 1.63        | 180                 |
| 0.25:4.2                                 | 0.0326                                 | 1.12                         | 0.344        | /             | 0.2        | 0.2         | 1.63        | 180                 |
| 0.25:4.8                                 | 0.0326                                 | 1.28                         | 0.344        | /             | 0.2        | 0.2         | 1.63        | 180                 |
| 0.25:5.4                                 | 0.0326                                 | 1.44                         | 0.344        | /             | 0.2        | 0.2         | 1.63        | 180                 |
| 0.15:4.2                                 | 0.0196                                 | 1.12                         | 0.344        | /             | 0.2        | 0.2         | 1.63        | 180                 |
| 0.35:4.2                                 | 0.0456                                 | 1.12                         | 0.344        | /             | 0.2        | 0.2         | 1.63        | 180                 |
| 0.25:4.2:2                               | 0.0326                                 | 1.12                         | 0.229        | /             | 0.2        | 0.2         | 1.63        | 180                 |
| 0.25:4.2:4                               | 0.0326                                 | 1.12                         | 0.458        | /             | 0.2        | 0.2         | 1.63        | 180                 |
| 0.25:4.2-160 °C                          | 0.0326                                 | 1.12                         | 0.344        | /             | 0.2        | 0.2         | 1.63        | 160                 |
| 0.25:4.2-170 °C                          | 0.0326                                 | 1.12                         | 0.344        | /             | 0.2        | 0.2         | 1.63        | 170                 |
| 0.25:4.2-190 °C                          | 0.0326                                 | 1.12                         | 0.344        | /             | 0.2        | 0.2         | 1.63        | 190                 |
| 0.25:4.2-w/o OAm                         | 0.0326                                 | 1.12                         | 0.344        | /             | 0.2        | /           | 1.63        | 180                 |
| 0.25:4.2-0.1 OAm                         | 0.0326                                 | 1.12                         | 0.344        | /             | 0.2        | 0.1         | 1.63        | 180                 |
| 0.25:4.2-0.3 OAm                         | 0.0326                                 | 1.12                         | 0.344        | /             | 0.2        | 0.3         | 1.63        | 180                 |
| 0.25:4.2-w/o OA                          | 0.0326                                 | 1.12                         | 0.344        | /             | /          | 0.2         | 1.63        | 180                 |
| 0.25:4.2-0.1 OA                          | 0.0326                                 | 1.12                         | 0.344        | /             | 0.1        | 0.2         | 1.63        | 180                 |
| 0.25:4.2- 0.3 OA                         | 0.0326                                 | 1.12                         | 0.344        | /             | 0.3        | 0.2         | 1.63        | 180                 |
| CsSnI <sub>2.5</sub> Br <sub>0.5</sub>   | 0.0326                                 | 1.12                         | 0.287        | 0.053         | 0.2        | 0.2         | 1.63        | 180                 |
| CsSnI <sub>2.25</sub> Br <sub>0.75</sub> | 0.0326                                 | 1.12                         | 0.259        | 0.080         | 0.2        | 0.2         | 1.63        | 180                 |

**Table S2.** Summary of the average NC's size and distribution, PL fwhm, PLQY, and average lifetimes ( $\tau_{\text{ave}}$ ) for typical samples.

| Sample   | PLQY<br>(%) | PL FWHM<br>(nm) | Average NC's size<br>(nm) | Size distribution<br>(nm) | $\tau_{\text{ave}}$<br>(ns) |
|----------|-------------|-----------------|---------------------------|---------------------------|-----------------------------|
| 0.25:3   | 4.3         | 93              | 26                        | 15-45                     | 0.70                        |
| 0.25:3.6 | 8.3         | 81              | 29                        | 15-45                     | 0.85                        |
| 0.25:4.2 | 13.8        | 77              | 33                        | 20-45                     | 1.26                        |
| 0.25:4.8 | 18.4        | 79              | 37                        | 10-170                    | 1.36                        |
| 0.25:5.4 | 8.2         | 80              | 63                        | 15-265                    | 0.88                        |



**Table S3.** Fitting results of PL decay curves,  $\tau_{\text{ave}}$ , PLQYs, radiative ( $\Gamma_{\text{rad}}$ ) and nonradiative ( $\Gamma_{\text{non-rad}}$ ) decay rates of CsSnI<sub>3</sub> and CsSn(I, Br)<sub>3</sub> NCs. Note that only the decay curve of 0.25:3 was fitted by a tri-exponential function, because it cannot be fitted well by a double-exponential function. It is also necessary to fit the decays of 0.25:3.6, 0.25:4.2 and 0.25:4.8 by a double-exponential function.

| Sample                                   | A <sub>1</sub> | $\tau_1$<br>(ns) | A <sub>2</sub> | $\tau_2$<br>(ns) | A <sub>3</sub> | $\tau_3$<br>(ns) | A <sub>0</sub> | Adjusted<br>R-<br>square | $\tau_{\text{ave}}$<br>(ns) | PLQY<br>(%) | $\Gamma_{\text{rad}}$<br>( $\mu\text{s}^{-1}$ ) | $\Gamma_{\text{non-rad}}$<br>( $\mu\text{s}^{-1}$ ) |
|------------------------------------------|----------------|------------------|----------------|------------------|----------------|------------------|----------------|--------------------------|-----------------------------|-------------|-------------------------------------------------|-----------------------------------------------------|
| 0.25:3                                   | 0.54           | 0.42             | 0.50           | 0.42             | 0.04           | 2.13             | 0.0091         | 0.9940                   | 0.70                        | 4.3         | 61.43                                           | 1367.14                                             |
| 0.25:3.6                                 | 0.93           | 0.48             | 0.13           | 1.63             |                |                  | 0.0102         | 0.9959                   | 0.85                        | 8.3         | 97.65                                           | 1078.82                                             |
| 0.25:4.2                                 | 1.00           | 0.69             | 0.07           | 3.07             |                |                  | 0.0141         | 0.9952                   | 1.26                        | 13.8        | 109.52                                          | 684.41                                              |
| 0.25:4.8                                 | 0.74           | 0.61             | 0.29           | 1.95             |                |                  | 0.0144         | 0.9977                   | 1.36                        | 18.4        | 135.29                                          | 600.00                                              |
| 0.25:5.4                                 | 0.86           | 0.58             | 0.17           | 1.49             |                |                  | 0.0163         | 0.9970                   | 0.88                        | 8.2         | 93.18                                           | 1043.18                                             |
| CsSnI <sub>2.5</sub> Br <sub>0.5</sub>   | 0.85           | 0.56             | 0.09           | 3.84             |                |                  | 0.0835         | 0.9927                   | 1.94                        | 7.7         | 39.69                                           | 475.77                                              |
| CsSnI <sub>2.25</sub> Br <sub>0.75</sub> | 1.03           | 1.67             |                |                  |                |                  | 0.0251         | 0.9928                   | 1.67                        | 7.1         | 42.51                                           | 556.29                                              |

**Table S4.** IR vibrational modes and their assignments for CsSnI<sub>3</sub> NCs.

| Frequency (cm <sup>-1</sup> ) | Functional group assigned                                      | References |
|-------------------------------|----------------------------------------------------------------|------------|
| 2926                          | C-H stretching vibration of methylene group (CH <sub>2</sub> ) | 2          |
| 2854                          | C-H stretching vibration of methyl group (CH <sub>3</sub> )    | 2          |
| 1745                          | C=O stretching vibration                                       | 2          |
| 1649                          | C=C stretching vibration                                       | 3          |
| 1541                          | COO- asymmetric stretching vibration                           | 2,4        |
| 1462                          | C-H bending vibration of methylene group (CH <sub>2</sub> )    | 5          |
| 1377                          | C-H bending vibration of methyl group (CH <sub>3</sub> )       | 6          |
| 1082                          | C-P stretching vibration                                       | 7,8        |
| 721                           | C-H out-of-plane vibration or C-C stretching vibrations        | 9-11       |

**Table S5.** Summary of ligand density of perovskite NCs solutions.

| Sample                           | Ligand   | Ligand density (nm <sup>-2</sup> ) | References |
|----------------------------------|----------|------------------------------------|------------|
| CsPbCl <sub>3</sub>              | OA + OAm | 25.31                              | 4          |
| CsPbBr <sub>3</sub> <sup>a</sup> | OA + OAm | 6.7                                | 12         |
| CsPbI <sub>3</sub>               | OA + OAm | 25-40                              | 3          |
| FAPbI <sub>3</sub>               | OA + OAm | 20-35                              | 3          |
| CsSnI <sub>3</sub>               | OA + OAm | 1.8                                | This work  |
|                                  | TOP      | 2.0                                |            |

<sup>a</sup> The sample used for the characterization is the product of as-synthesized NCs that undergo one-cycle ligand removal.

## REFERENCES

- (1) Jellicoe, T. C.; Richter, J. M.; Glass, H. F. J.; Tabachnyk, M.; Brady, R.; Dutton, S. E.; Rao, A.; Friend, R. H.; Credgington, D.; Greenham, N. C.; Böhm, M. L. Synthesis and Optical Properties of Lead-Free Cesium Tin Halide Perovskite Nanocrystals. *J. Am. Chem. Soc.* **2016**, *138* (9), 2941-2944.
- (2) Chiba, T.; Hayashi, Y.; Ebe, H.; Hoshi, K.; Sato, J.; Sato, S.; Pu, Y.-J.; Ohisa, S.; Kido, J. Anion-exchange red perovskite quantum dots with ammonium iodine salts for highly efficient light-emitting devices. *Nat. Photonics* **2018**, *12* (11), 681-687.
- (3) Hao, M.; Bai, Y.; Zeiske, S.; Ren, L.; Liu, J.; Yuan, Y.; Zarrabi, N.; Cheng, N.; Ghasemi, M.; Chen, P.; Lyu, M.; He, D.; Yun, J.-H.; Du, Y.; Wang, Y.; Ding, S.; Armin, A.; Meredith, P.; Liu, G.; Cheng, H.-M.; Wang, L. Ligand-assisted cation-exchange engineering for high-efficiency colloidal Cs<sub>1-x</sub>FA<sub>x</sub>PbI<sub>3</sub> quantum dot solar cells with reduced phase segregation. *Nat. Energy* **2020**, *5* (1), 79-88.
- (4) Shen, X.; Zhang, Y.; Kershaw, S. V.; Li, T.; Wang, C.; Zhang, X.; Wang, W.; Li, D.; Wang, Y.; Lu, M.; Zhang, L.; Sun, C.; Zhao, D.; Qin, G.; Bai, X.; Yu, W. W.; Rogach, A. L. Zn-Alloyed CsPbI<sub>3</sub> Nanocrystals for Highly Efficient Perovskite Light-Emitting Devices. *Nano Lett.* **2019**, *19* (3), 1552-1559.
- (5) Pan, J.; Quan, L. N.; Zhao, Y.; Peng, W.; Murali, B.; Sarmah, S. P.; Yuan, M.; Sinatra, L.; Alyami, N. M.; Liu, J.; et al. Highly Efficient Perovskite-Quantum-Dot Light-Emitting Diodes by Surface Engineering. *Adv. Mater.* **2016**, *28* (39), 8718-8725.
- (6) Arief, V. O.; Trilestari, K.; Sunarso, J.; Indraswati, N.; Ismadji, S. Recent Progress on Biosorption of Heavy Metals from Liquids Using Low Cost Biosorbents: Characterization, Biosorption Parameters and Mechanism Studies. *CLEAN - Soil, Air, Water* **2008**, *36* (12), 937-962.
- (7) Chen, S.; Zhang, X.; Zhang, Q.; Tan, W. Trioctylphosphine as Both Solvent and Stabilizer to Synthesize CdS Nanorods. *Nanoscale Res. Lett.* **2009**, *4* (10), 1159-1165.

- (8) Liu, F.; Zhang, Y.; Ding, C.; Kobayashi, S.; Izuishi, T.; Nakazawa, N.; Toyoda, T.; Ohta, T.; Hayase, S.; Minemoto, T.; Yoshino, K.; Dai, S.; Shen, Q. Highly Luminescent Phase-Stable CsPbI<sub>3</sub> Perovskite Quantum Dots Achieving Near 100% Absolute Photoluminescence Quantum Yield. *ACS Nano* **2017**, *11* (10), 10373-10383.
- (9) Mourdikoudis, S.; Liz-Marzán, L. M. Oleylamine in Nanoparticle Synthesis. *Chem. Mater.* **2013**, *25* (9), 1465-1476.
- (10) Sinclair, R. G.; McKay, A. F.; Jones, R. N. The Infrared Absorption Spectra of Saturated Fatty Acids and Esters<sup>1</sup>. *J. Am. Chem. Soc.* **1952**, *74* (10), 2570-2575.
- (11) Pan, J.; Shang, Y.; Yin, J.; De Bastiani, M.; Peng, W.; Dursun, I.; Sinatra, L.; El-Zohry, A. M.; Hedhili, M. N.; Emwas, A. H.; Mohammed, O. F.; Ning, Z.; Bakr, O. M., Bidentate Ligand-Passivated CsPbI<sub>3</sub> Perovskite Nanocrystals for Stable Near-Unity Photoluminescence Quantum Yield and Efficient Red Light-Emitting Diodes. *J. Am. Chem. Soc.* **2018**, *140* (2), 562-565.
- (12) Li, J.; Xu, L.; Wang, T.; Song, J.; Chen, J.; Xue, J.; Dong, Y.; Cai, B.; Shan, Q.; Han, B.; et al. 50-Fold EQE improvement up to 6.27% of solution-processed all-inorganic perovskite CsPbBr<sub>3</sub> QLEDs via surface ligand density control. *Adv. Mater.* **2017**, *29* (5), 1603885.
